# Supplementary material for: Smac mimetic and demethylating agents synergistically trigger cell death in acute myeloid leukemia cells and overcome apoptosis resistance by inducing necroptosis
Source: PubMed Central journal article supplement — Cell Death Dis. 2013 Sep 12;4(9):e802–. doi: 10.1038/cddis.2013.320 (PMC3789178; doi:10.1038/cddis.2013.320), 2013-09-12
Supplement: cddis2013320x1.pdf [file cddis2013320x1.pdf]

**Suppl. Tab. 1. Characteristics of AML cell lines.**

| <b>Cell line</b> | <b>FAB classification</b> | <b>Genetics</b>                                              |
|------------------|---------------------------|--------------------------------------------------------------|
| NB4              | FAB M3                    | t(15;17) (q22;q11-12)                                        |
| MV4-11           | FAB M5                    | t(4;11)(q21;q23)<br>FLT3-ITD mutation<br>MLL-AF4 fusion      |
| Molm13           | FAB M5a                   | FLT3-ITD mutation<br>MLL-AF9 fusion<br>ins(11;9)(q23;p22p23) |
| MonoMac6         | FAB M5                    | t(9;11)(p22;q23)<br>MLL-AF9 fusion                           |
| OCI-AML3         | FAB M4                    | NPM1-gene-mutation (Type A)<br>DNMT3a R882C mutation         |

**Suppl. Tab. 2. Synergistic induction of apoptosis by BV6 and demethylating agents in AML.**

| Cell line | BV6 + 5AC |               | BV6 + DAC |               |
|-----------|-----------|---------------|-----------|---------------|
|           | <i>CI</i> | <i>fa (%)</i> | <i>CI</i> | <i>fa (%)</i> |
| MV4-11    | 0.094     | 37.3          | 0.150     | 49.9          |
| NB4       | 0.233     | 50.9          | 0.254     | 67.7          |
| Molm13    | 0.271     | 56.6          | 0.161     | 64.3          |
| MonoMac6  | 0.105     | 56.8          | 0.019     | 49.7          |
| OCI-AML3  | 0.436     | 68            | 1.113     | 11.3          |

AML cell lines were treated for 72 hours with BV6 and/or 5AC or DAC as indicated in the figure legend of Fig. 1. Apoptosis was determined by forward/side scatter analysis and flow cytometry. Combination index (CI) and fraction affected (fa) were calculated by CalcuSyn software as described in Materials and Methods. CI values and fraction affected are indicated for the following concentrations: MV4-11: 300 nM 5AC/100 nM BV6, 50 nM DAC/100 nM BV6; NB4: 300 nM 5AC/600 nM BV6, 30 nM DAC/600 nM BV6; Molm13: 300 nM 5AC/100 nM BV6, 50 nM DAC/100 nM BV6; MonoMac6: 600 nM 5AC/3  $\mu$ M BV6, 300 nM DAC/3  $\mu$ M BV6; OCI-AML3: 100  $\mu$ M 5-AC/2  $\mu$ M BV6, 6  $\mu$ M DAC, 2  $\mu$ M BV6. CI <0.9 indicates synergism, 0.9-1.1 additivity and >1.1 antagonism.

Suppl. Fig. 1

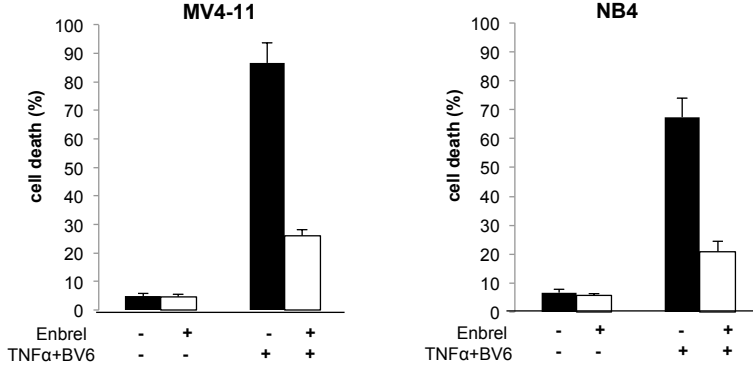

## **Supplementary Figure legend**

### **Supplementary Fig. 1. Enbrel blocks BV6/TNF $\alpha$ -induced cell death.**

MV4-11 and NB4 cells were treated for 48 hours with BV6 (MV4-11: 600 nM BV6, NB4: 100 nM BV6) and/or 30 ng/ml TNF $\alpha$  in the presence or absence of 100  $\mu$ g/ml Enbrel. Cell death was determined by forward/side scatter analysis. Mean and SD of three experiments performed in triplicate are shown.
